# Supplementary material for: AAV-CRISPR/Cas9 Gene Editing Preserves Long-Term Vision in the P23H Rat Model of Autosomal Dominant Retinitis Pigmentosa
Source: MDPI journal article supplement (doi:10.3390/pharmaceutics14040824), 2022-04-09
Supplement: s1 [file s1]

# Supplementary Materials: AAV-CRISPR/Cas9 Gene Editing Preserves Long-Term Vision in the P23H Rat Model of Autosomal Dominant Retinitis Pigmentosa

Saba Shahin, Hui Xu, Bin Lu, Augustus Mercado, Melissa K Jones, Benjamin Bakondi and Shaomei Wang

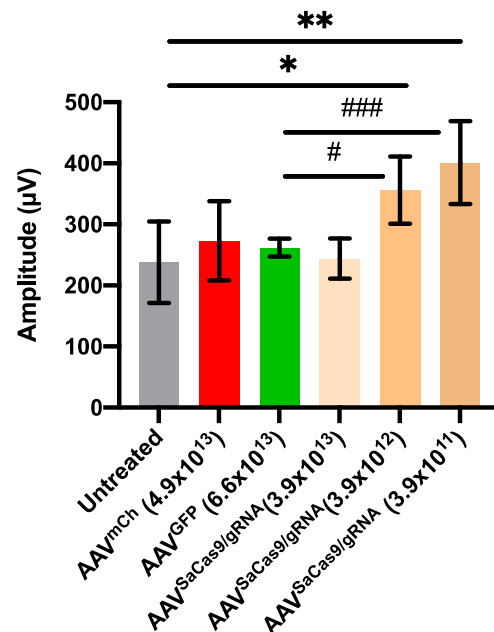

**Figure S1.** AAV controls. To assess AAV toxicity and determine optimal dose, P15 P23H/SD rats received a single unilateral trans-scleral subretinal injection of 2µl AAV at concentrations of  $3.9 \times 10^{13}$  GC/ml ( $244 \pm 33\mu V$ ,  $n = 14$ ),  $3.9 \times 10^{12}$  ( $356 \pm 55\mu V$ ,  $n = 3$ ), or  $3.9 \times 10^{11}$  ( $401 \pm 68\mu V$ ,  $n = 3$ ) (orange bars), and control rats received either AAV8.CMV-mCherry (AAVmCh  $4.9 \times 10^{13}$  GC/ml, red bar), or AAV8.CMV-GFP (AAVGFP  $6.6 \times 10^{13}$  GC/ml, green bar), or left untreated (untreated controls: grey bar). ERG at P90 showed that retinal perturbation from AAV controls significantly reduced visual function, whereas AAV containing SaCas9/gRNA showed improved visual function and had no deleterious effect compared to sham-operated eyes. Dosages are shown as genome copies (GC) per microliter. Data represents the mean  $\pm$  SEM.  $^{\#}p \leq 0.05$ ,  $^{###}p \leq 0.01$ ;  $^*p \leq 0.05$ ,  $^{**}p \leq 0.001$ .

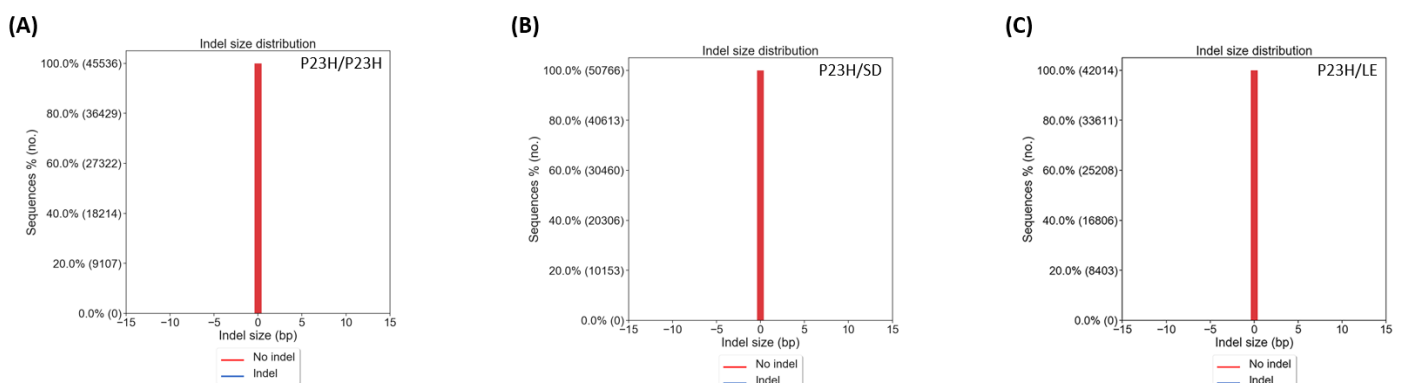

**Figure S2.** Indel profile of untreated controls: Representative graphs showing the frequencies and distributions of indels in untreated P23H [P23H/P23H (A), P23H/SD (B) and P23H/LE (C)] rats. No insertion and/or deletion were detected at predicted cleavage site of the targeted region.

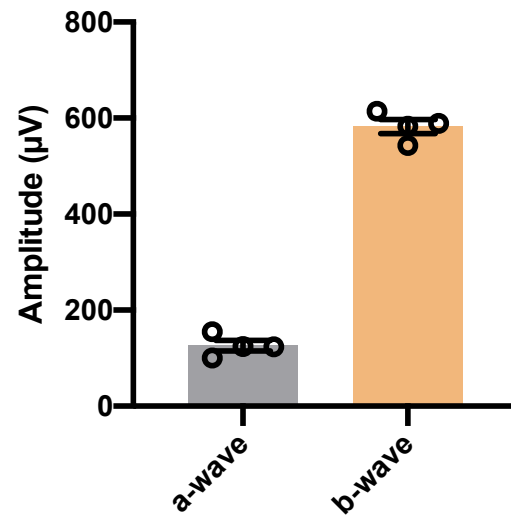

**Figure S3.** Electroretinography (ERG) of wild type Long Evans (LE) rats: Four adult LE rats, both male and female were dark-adapted overnight. ERG response amplitudes to full field light stimulation were recorded. ERG showed no change in a-wave ( $125.96 \pm 11.26 \mu\text{V}$ ) and b-wave ( $582.26 \pm 14.69 \mu\text{V}$ ) in these four LE rats of different ages (P124, P154 and P284). Data represents the mean  $\pm$  SEM ( $n = 4$ ).

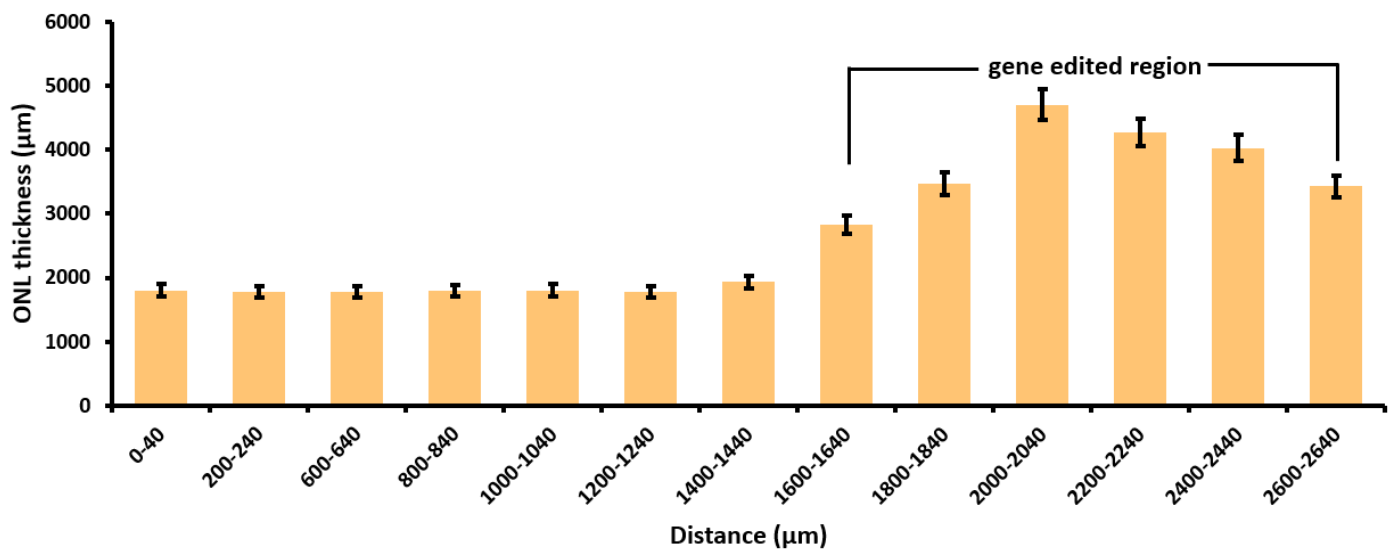

**Figure S4.** Quantification of ONL thickness along its rostral-caudal axis up to 2640  $\mu\text{m}$  in the AAV-treated retina: ONL rescue was documented in the gene edited region (from 1600  $\mu\text{m}$  to 2640  $\mu\text{m}$ ) that clearly demonstrates photoreceptor rescue in this gene edited region of the AAV-treated retina.

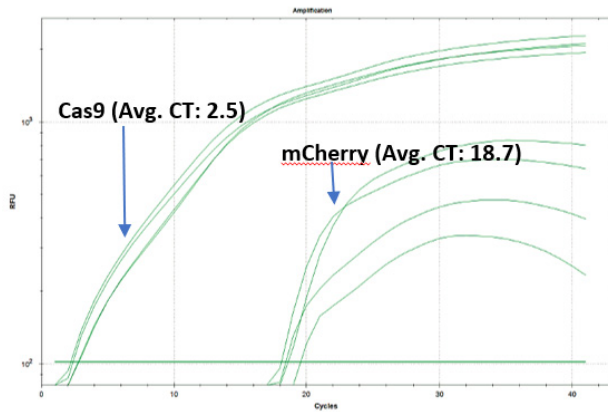

|               | Ct values | avg.Ct | deltaCt | RQ     |
|---------------|-----------|--------|---------|--------|
| CMV-mCherry1  | 19.58     | 18.695 | 16.1525 | 72,843 |
| CMV-mCherry2  | 18.09     |        |         |        |
| CMV-mCherry3  | 18.39     |        |         |        |
| CMV-mCherry4  | 18.72     |        |         |        |
| ntc           | 0         |        |         |        |
| mOp500-SaCas1 | 2.85      | 2.5425 |         |        |
| mOp500-SaCas2 | 2.79      |        |         |        |
| mOp500-SaCas3 | 2.34      |        |         |        |
| mOp500-SaCas4 | 2.19      |        |         |        |
| ntc           | 0         |        |         |        |

**Figure S5.** Assessment of AAV packaging efficiency. Real-time PCR amplification showing AAV packaging frequency of mCherry compared with SaCas9 transcripts. Cycle Threshold (CT) values are shown for amplified vector regions spanning the mOp500 promoter and SaCas9 (avg. CT: 2.5), or CMV promoter and mCherry transcripts (avg. CT: 18.7). Relative quantification ( $\Delta$ CT: 16.15) indicated that the SaCas9 transcript was  $7.2 \times 10^4$ -fold more abundant than mCherry. RT-PCR was performed in quadruplicate using SYBR-green detection. Primer sequences are as follows: CMV-mCherry: Forward primer GTAACAACCTCCGCCCATTT, Reverse primer: ATGGCCATGTTATCCTCCTC; mOp500-SaCas9: Forward primer GGGTCAGTGCCTGGAGTT, Reverse primer: ATACCGACCTTCCGCTTCT.

**Table S1.** Predicted on- and off-targets sites for gRNA.

|        | Target Sequence          | PAM        | Mis-match | Fwd Priming Site         | Rev Priming Site      |
|--------|--------------------------|------------|-----------|--------------------------|-----------------------|
| OFF-T1 | TGGaCCCAAGAaAcAG-cAGCCA  | GGGAG<br>T | 5         | GGAAAACACAGTGC-TACAGTC   | TCAGGAA-GAGGTTTCATGGT |
| OFF-T2 | TaGGCCCAAA-tAttAtGTAGCCA | GTGAG<br>T | 5         | TTCTCTCAACGGG-GATTGAC    | GACATTAGGAGCCAC-CTACC |
| OFF-T3 | TGtGCaCAAAtACacAG-TAGCCA | AA-GAGT    | 5         | GAGCTG-TACACAGGTCTAGC    | GAAGGACAGCAGA-GAGCTAA |
| ON-T   | TGGGCCCAAGAC-GAAGTAGCCA  | TGGAG<br>T | 0         | ACAGAGGGCCCCAATTT<br>TTA | CCCAG-TCTCTCTGCTCATAC |

**Table S2.** Primer sequences used for qPCR.

| Gene           | Sense (5'-3')          | Antisense (5'-3')      | Accession Number |
|----------------|------------------------|------------------------|------------------|
| <i>r-Atf6</i>  | ATGGAGTCGCCTTTTAGTCC   | CTGTACCGACTCAGGGAGGG   | NM_001107196.1   |
| <i>r-Atg5</i>  | ACCTCGGTTTGGCTTGGTTG   | AGTATGGCTCTGCTTCTCGTT  | NM_001014250.1   |
| <i>r-Atg7</i>  | AGCCTGTTTCATCCAAAGTTCT | CTGTGGTTGCTCAGACGGT    | NM_001012097.1   |
| <i>r-Becn1</i> | GCGTCGGGGCCTAAAGAATG   | CTCCTGGCTCTCTCCTGGTT   | NM_053739.2      |
| <i>r-BiP</i>   | GACCACCTATTCTGCGTCGGT  | CGCCAATCAGACGCTCCCCT   | NM_013083.2      |
| <i>r-Chop</i>  | AGGAGAGAGAAACCGGTCCAA  | GGACACTGTCTCAAAGGCGA   | NM_024134.2      |
| <i>r-Gapdh</i> | ACAGCAACTCCCATTCTTCCA  | TCCAGGGTTTCTTACTCCTTGG | NM_017008.4      |
| <i>r-Gnat1</i> | TGACGTGCATCATTTTCATC   | TTAAGCTCCAGGAAGTGCAC   | NM_001108780.2   |
| <i>r-Perk</i>  | GAAGTGGCAAGAGGAGATGG   | GAGTGGCCAGTCTGTGCTTT   | NM_031599.2      |
| <i>r-Rho</i>   | GTCCACTTCACCATCCCC     | CTGCCTTCTGAGTGGTAGCC   | NM_033441.1      |
| <i>m-Rho</i>   | ACAGTCAAGGAGGCGGCT     | GCAAAGAAAGCTGGCAGAG    | NM_145383.2      |

**Table S3.** Frequency of indels and frameshift in AAV-SaCas9/gRNA treated and untreated P23H rats.

| Genotype  | Groups      | Number of Total Target Reads | Number of Reads with Indels | Frequency of Indels (%) | Number of Frameshift Reads | Frequency of Frameshift (%) |
|-----------|-------------|------------------------------|-----------------------------|-------------------------|----------------------------|-----------------------------|
| P23H/P23H | Untreated   | 44782                        | 0                           | 0.00                    | 5                          | 0.01                        |
|           | AAV-treated | 131250                       | 6404                        | 4.88                    | 7596                       | 5.78                        |
| P23H/SD   | Untreated   | 50766                        | 0                           | 0.00                    | 1                          | 0.06                        |
|           | AAV-treated | 119481                       | 13019                       | 10.89                   | 15032                      | 12.58                       |
| P23H/LE   | Untreated   | 42014                        | 0                           | 0.0                     | 1                          | 0.00                        |
|           | AAV-treated | 167609                       | 21705                       | 12.95                   | 24375                      | 14.54                       |

**Table S4.** Off-target analysis of CRISPR/Cas9-mediated editing of *m-Rho*<sup>P23H</sup> in P23H rats.

|               |             | Off-Target 1                      |                                    |                                    | Off-Target 2                      |                                    |                               | Off-Target 3                      |                                    |                               |
|---------------|-------------|-----------------------------------|------------------------------------|------------------------------------|-----------------------------------|------------------------------------|-------------------------------|-----------------------------------|------------------------------------|-------------------------------|
| Geno-<br>type | Group<br>s  | Number of<br>reads with<br>indels | Number of<br>total target<br>reads | Fre-<br>quency of<br>Indels<br>(%) | Number of<br>reads with<br>indels | Number of<br>total target<br>reads | Frequency<br>of Indels<br>(%) | Number of<br>reads with<br>indels | Number of<br>total target<br>reads | Frequency<br>of Indels<br>(%) |
| P23H/P23H     | Untreated   | 0                                 | 149598                             | 0                                  | 0                                 | 128268                             | 0                             | 0                                 | 141561                             | 0                             |
|               | AAV-treated | 0                                 | 117695                             | 0                                  | 0                                 | 102693                             | 0                             | 0                                 | 151268                             | 0                             |
| P23H/SD       | Untreated   | 0                                 | 103016                             | 0                                  | 0                                 | 143373                             | 0                             | 0                                 | 153068                             | 0                             |
|               | AAV-treated | 0                                 | 76721                              | 0                                  | 0                                 | 136605                             | 0                             | 0                                 | 65796                              | 0                             |
| P23H/LE       | Untreated   | 0                                 | 55228                              | 0                                  | 0                                 | 105284                             | 0                             | 0                                 | 201194                             | 0                             |
|               | AAV-treated | 0                                 | 26572                              | 0                                  | 0                                 | 133679                             | 0                             | 0                                 | 156138                             | 0                             |
